# Supplementary material
Source: ML conference proceedings conference paper supplement (https://aclanthology.org/2020.aacl-main.44)

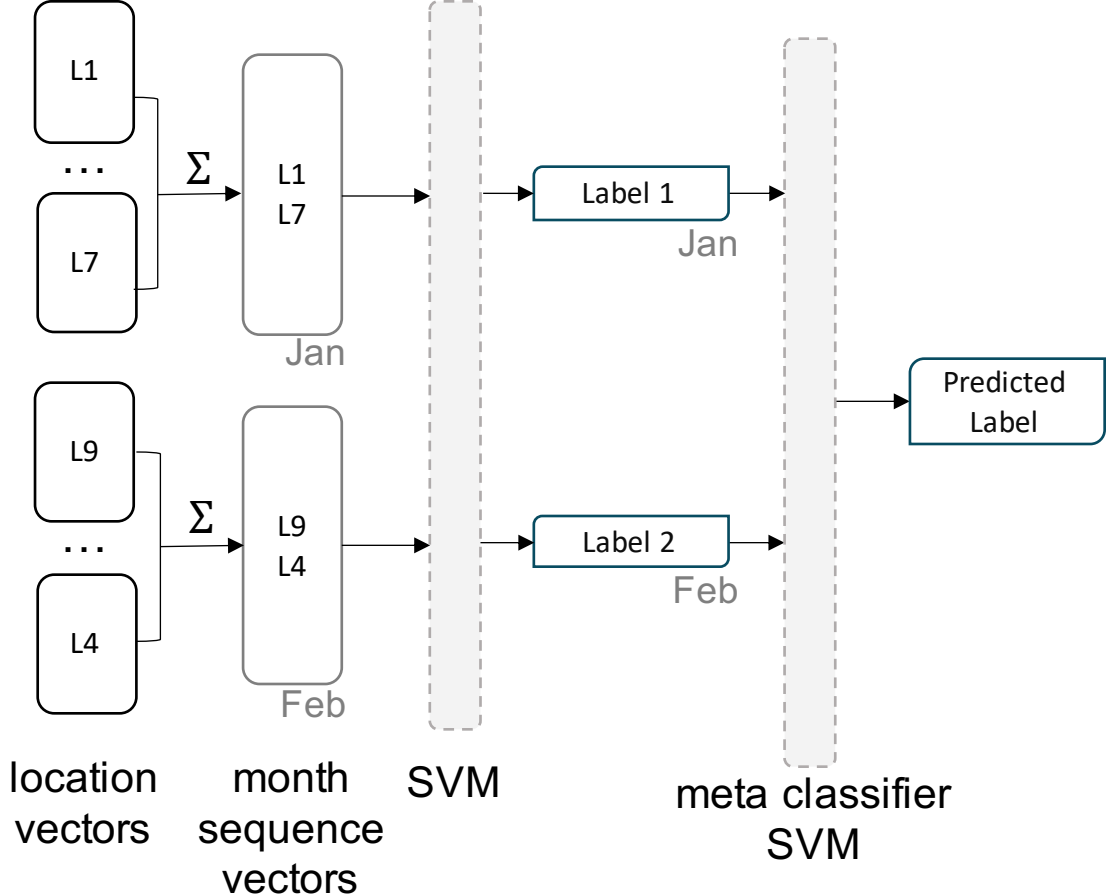

Supplement: Software [file 2020.aacl-main.44.Software.zip]
